# Supplementary material for: Chromatin Reader Dido3 Regulates the Genetic Network of B Cell Differentiation
Source: Research Square preprint supplement (doi:10.21203/rs.3.rs-1031396/v1), 2021-11-11
Supplement: Supplementary file 1 [file dac0780253ae20e788cea9f8.xlsx]

## Sheet: Hoja1
	logFC	logCPM	LR	PValue	FDR
ENSMUSG00000076613_Ighg2b	5.17738	11.0115	201.454	1.00608e-45	2.7969e-43
ENSMUSG00000094028_Ighd4-1	3.43579	11.648	114.786	8.76436e-27	1.21825e-24
ENSMUSG00000094057_Ighd2-7	4.1328	8.67285	92.4153	7.02671e-22	6.51142e-20
ENSMUSG00000095897_Ighd2-5	2.70591	9.02573	60.6346	6.8716e-15	4.77576e-13
ENSMUSG00000095444_Ighd2-4	2.20392	9.67439	54.5986	1.47844e-13	8.22012e-12
ENSMUSG00000076630_Ighd1-1	1.79392	11.2532	30.6398	3.10661e-08	1.4394e-06
ENSMUSG00000096568_Ighd2-3	1.79857	9.51005	29.5104	5.56176e-08	2.20881e-06
ENSMUSG00000096150_Ighv1-85	2.00168	8.37291	21.7638	3.08369e-06	0.000107158
ENSMUSG00000093955_Ighv1-34	-1.68381	8.6391	20.0707	7.46303e-06	0.000230525
ENSMUSG00000076633_Ighv5-2	1.1491	10.776	18.7699	1.47473e-05	0.000409974
ENSMUSG00000096464_Ighv2-2	1.19609	11.7479	17.8036	2.44916e-05	0.00061897
ENSMUSG00000094117_Igkv3-12	1.17799	11.2785	16.1877	5.73642e-05	0.00132894
ENSMUSG00000095416_Ighv1-12	-1.18005	9.75657	15.9939	6.35469e-05	0.00135893
ENSMUSG00000103439_Gm7019	1.11173	12.0008	15.0978	0.000102081	0.00202705
ENSMUSG00000095130_Ighv1-39	-1.07306	10.047	14.7446	0.000123096	0.00228139
ENSMUSG00000105630_Gm42543	1.95838	7.62244	13.8997	0.000192827	0.00331427
ENSMUSG00000094051_Ighv1-36	-1.72987	8.40681	13.704	0.000213997	0.00331427
ENSMUSG00000076620_Ighj2	1.17313	9.80408	13.6988	0.000214593	0.00331427
ENSMUSG00000094561_Ighv1-22	-0.968802	10.031	11.9407	0.000549219	0.00803594
ENSMUSG00000076531_Igkv4-92	0.947769	9.64418	11.4133	0.000729194	0.0101358
ENSMUSG00000094940_Ighv1-84	-1.56975	7.86348	11.06	0.000882093	0.0116772
ENSMUSG00000076598_Igkv3-7	0.97404	11.825	10.7807	0.00102561	0.01296
ENSMUSG00000096074_Ighv1-72	1.07845	9.63556	10.0678	0.00150884	0.0182372
ENSMUSG00000095866_Ighv2-4	0.955058	9.20665	9.66628	0.00187681	0.0217397
ENSMUSG00000096649_Ighv1-31	-1.60328	7.74618	9.53362	0.00201741	0.0224336
ENSMUSG00000094652_Ighv1-42	-0.975189	9.26275	9.32515	0.0022603	0.0237957
ENSMUSG00000076695_Ighv1-18	-0.925848	10.3922	9.27549	0.0023224	0.0237957
ENSMUSG00000095863_Ighv1-67	-1.14423	8.51612	9.21783	0.00239669	0.0237957
ENSMUSG00000093896_Ighv1-76	-0.834787	10.7236	8.36705	0.00382085	0.0366274
ENSMUSG00000094546_Ighv1-26	-0.911195	11.9062	8.20956	0.00416703	0.0385704
ENSMUSG00000106124_Gm42539	1.86939	6.46688	8.15215	0.00430102	0.0385704
ENSMUSG00000103537_Gm37838	1.56702	6.59522	7.971	0.00475326	0.0412939
ENSMUSG00000094694_Ighv1-9	-0.759645	11.004	7.40627	0.0064997	0.054755
ENSMUSG00000094951_Ighv5-6	0.726667	11.0872	7.30006	0.00689522	0.0549046
ENSMUSG00000095700_Ighv10-3	-0.78361	10.5656	7.29558	0.00691245	0.0549046
ENSMUSG00000095612_Ighv5-4	0.744399	11.5735	7.11169	0.00765827	0.0591389
ENSMUSG00000000001_Gm30996	2.10296	4.81117	6.7535	0.00935637	0.0702992
ENSMUSG00000103297_Ighv3-2	-1.47282	7.3304	6.69337	0.00967722	0.0707965
ENSMUSG00000104760_Igkv3-8	1.65895	5.00513	6.4704	0.0109686	0.0781862
ENSMUSG00000102942_Ighv1-33	-2.12642	3.91094	6.39753	0.0114279	0.0794239
ENSMUSG00000094533_Ighv11-1	-1.66933	5.87594	6.31963	0.0119408	0.0800588
ENSMUSG00000076596_Igkv3-10	0.673171	10.4227	6.29686	0.0120952	0.0800588
ENSMUSG00000106098_Igkv14-118-2	1.49553	5.31228	6.05847	0.0138398	0.0894758
ENSMUSG00000076501_Igkv2-137	0.646927	10.8554	5.99637	0.0143353	0.0898071
ENSMUSG00000095197_Ighv1-59	-0.721533	9.91443	5.94771	0.0147364	0.0898071
ENSMUSG00000102654_Ighv1-21	-1.20113	7.45384	5.93297	0.0148602	0.0898071
ENSMUSG00000094087_Ighv1-61	-0.759888	9.16422	5.71295	0.0168402	0.099608
ENSMUSG00000094164_Ighv2-3	0.685587	9.60526	5.34609	0.0207688	0.120286
ENSMUSG00000103168_Gm30948	2.03347	3.0073	5.22283	0.0222923	0.124087
ENSMUSG00000106601_Ighv1-70	-1.38113	5.69079	5.22084	0.0223178	0.124087
ENSMUSG00000096594_Igkv8-19	0.632207	11.1832	5.11593	0.0237071	0.128057
ENSMUSG00000095170_Ighv8-11	-1.3695	6.25424	5.09803	0.0239531	0.128057
ENSMUSG00000094075_Ighv1-80	-0.620116	10.048	4.95711	0.0259836	0.136291
ENSMUSG00000095981_Ighv10-1	-0.58883	10.5549	4.81117	0.0282758	0.145568
ENSMUSG00000102888_Ighv1-11	-0.921386	8.27125	4.77203	0.0289257	0.146206
ENSMUSG00000095442_Ighv1-4	-0.663939	9.15982	4.7178	0.0298519	0.148193
ENSMUSG00000076589_Igkv8-18	0.94754	8.36826	4.62057	0.0315907	0.154074
ENSMUSG00000102952_Ighv1-25	-1.30758	5.74548	4.29499	0.0382247	0.183215
ENSMUSG00000095771_Igkv14-111	0.533274	10.2865	4.17979	0.0409087	0.192756
ENSMUSG00000105462_Igkv4-77	0.531311	9.93847	4.13771	0.0419378	0.194312
ENSMUSG00000076676_Ighv12-3	-0.68718	9.13269	4.10009	0.042881	0.195425
ENSMUSG00000094198_Ighv1-50	-0.585001	10.1162	4.01208	0.0451754	0.200505
ENSMUSG00000094689_Ighv1-81	-0.584217	10.9978	3.99755	0.0455663	0.200505
ENSMUSG00000076621_Ighj1	0.884265	14.4042	3.97577	0.0461593	0.200505
ENSMUSG00000095589_Ighv1-55	-0.555041	10.9646	3.9444	0.0470276	0.201133
ENSMUSG00000094552_Ighd3-2	0.773591	8.43986	3.91043	0.0479874	0.202129
ENSMUSG00000096672_Ighv1-63	-0.763362	8.82568	3.763	0.0523983	0.217414
ENSMUSG00000106599_Ighv1-73	-1.39841	4.48734	3.71657	0.053875	0.220254
ENSMUSG00000102301_Ighv8-2	-0.936168	7.69515	3.59942	0.0577997	0.232874
ENSMUSG00000104213_Ighd	-0.659178	9.88176	3.47103	0.0624523	0.246478
ENSMUSG00000104769_Igkv8-34	0.941357	7.02804	3.44337	0.063506	0.246478
ENSMUSG00000104452_Ighv8-8	-0.527044	11.3098	3.43481	0.0638361	0.246478
ENSMUSG00000095429_Ighv5-12	0.49804	10.6064	3.3416	0.067549	0.257241
ENSMUSG00000076680_Ighv6-6	-0.52758	9.70008	3.21737	0.0728607	0.270678
ENSMUSG00000073028_Igkv4-71	-0.679574	8.77449	3.1817	0.074467	0.270678
ENSMUSG00000076581_Igkv8-26	1.03003	6.30415	3.16804	0.0750925	0.270678
ENSMUSG00000096250_Ighd2-6	-0.587085	10.4542	3.10256	0.0781694	0.270678
ENSMUSG00000076606_Igkj3	0.640924	11.5117	3.09446	0.0785591	0.270678
ENSMUSG00000095127_Ighv1-82	-0.504245	11.5939	3.08994	0.0787776	0.270678
ENSMUSG00000102678_Ighv1-21-1	-1.00404	5.87333	3.08886	0.07883	0.270678
ENSMUSG00000094787_Ighv1-54	-0.507166	9.60429	3.0881	0.0788667	0.270678
ENSMUSG00000094420_Igkv10-96	-0.45374	10.5607	3.06213	0.0801365	0.271682
ENSMUSG00000095571_Ighv5-17	0.463358	10.6475	2.91762	0.0876169	0.290011
ENSMUSG00000094262_Igkv4-62	0.874528	7.16048	2.90543	0.0882819	0.290011
ENSMUSG00000106403_Igkv20-101-2	-1.08297	6.07235	2.88026	0.0896716	0.290011
ENSMUSG00000095761_Ighv1-20	-1.05569	7.01746	2.87761	0.0898191	0.290011
ENSMUSG00000103203_Gm37327	1.32614	5.73369	2.85504	0.0910878	0.290011
ENSMUSG00000103271_Ighv4-2	-0.806116	7.60655	2.80779	0.0938075	0.290011
ENSMUSG00000096078_Ighv1-62-2	1.00176	7.45788	2.80752	0.0938235	0.290011
ENSMUSG00000095794_Igkv6-17	0.429883	10.4922	2.79456	0.0945846	0.290011
ENSMUSG00000094134_Ighv5-15	0.492453	9.24158	2.78869	0.0949317	0.290011
ENSMUSG00000076731_Ighv8-12	-0.50549	10.6615	2.76957	0.0960722	0.290305
ENSMUSG00000076666_Ighv14-4	-0.439885	10.9027	2.64082	0.10415	0.311329
ENSMUSG00000096844_Igkv6-14	0.598552	8.88295	2.58305	0.108013	0.319443
ENSMUSG00000095630_Igkv6-23	-0.436743	9.76589	2.49507	0.114204	0.334036
ENSMUSG00000094502_Ighv1-69	-0.406074	10.2379	2.47934	0.115351	0.334036
ENSMUSG00000103873_Ighv1-38	-0.84737	7.12423	2.4468	0.117765	0.336883
ENSMUSG00000104103_Gm9517	0.568057	8.59524	2.43363	0.118757	0.336883
ENSMUSG00000093838_Ighv3-1	-0.524646	8.89825	2.36655	0.123961	0.348091
ENSMUSG00000094094_Igkv5-45	0.397047	10.0367	2.30829	0.128686	0.357747
ENSMUSG00000094345_Igkv14-126	-0.501279	9.03502	2.27167	0.131758	0.362661
ENSMUSG00000096499_Ighv1-5	-0.416391	11.0011	2.24202	0.134306	0.366049
ENSMUSG00000105906_Iglc1	0.697952	15.6447	2.2133	0.136826	0.369297
ENSMUSG00000103989_Ighv5-21	1.18574	3.69669	2.18464	0.139394	0.37261
ENSMUSG00000095335_Igkv3-5	0.404688	9.63445	2.11419	0.145939	0.386392
ENSMUSG00000095285_Ighv5-9	0.490247	8.82248	2.09122	0.148148	0.386922
ENSMUSG00000076672_Ighv3-6	-0.439935	11.6609	2.08325	0.148923	0.386922
ENSMUSG00000095204_Ighv1-52	-0.383155	9.9033	2.05736	0.151473	0.389902
ENSMUSG00000105955_Igkv12-40	-0.831343	7.37206	2.01373	0.155882	0.395206
ENSMUSG00000094993_Igkv4-51	0.541211	8.5042	2.0081	0.156462	0.395206
ENSMUSG00000076543_Igkv4-74	-0.517388	8.59621	1.9952	0.157798	0.395206
ENSMUSG00000105757_Ighv1-83	-0.840099	5.46038	1.97361	0.160066	0.397305
ENSMUSG00000096498_Ighv2-5	0.376127	9.99479	1.93448	0.164269	0.40413
ENSMUSG00000106668_Iglj1	0.659776	16.2949	1.85306	0.173428	0.422922
ENSMUSG00000104712_Igkv4-75	-0.776276	6.01635	1.81471	0.177944	0.430161
ENSMUSG00000076934_Iglv1	0.621829	15.5288	1.79752	0.180012	0.431408
ENSMUSG00000103254_Ighv1-15	-0.420562	9.70403	1.67774	0.195225	0.463707
ENSMUSG00000094433_Igkv5-43	0.335544	10.7278	1.65992	0.197614	0.463707
ENSMUSG00000076578_Igkv6-29	-0.702788	7.42871	1.65343	0.198493	0.463707
ENSMUSG00000096355_Ighv8-4	-0.679161	6.59248	1.60775	0.204808	0.474473
ENSMUSG00000095519_Ighv1-66	-0.500453	8.57596	1.57623	0.209304	0.48088
ENSMUSG00000095889_Ighv1-58	-0.361397	9.36346	1.54469	0.213921	0.484357
ENSMUSG00000076534_Igkv12-89	-0.410829	8.95769	1.54202	0.214318	0.484357
ENSMUSG00000094174_Ighv6-4	0.870135	4.21544	1.5239	0.21703	0.484357
ENSMUSG00000102765_Ighv1-62	-0.586863	7.4362	1.5014	0.220456	0.484357
ENSMUSG00000105599_Gm9238	-0.786278	5.27896	1.46408	0.226283	0.484357
ENSMUSG00000076940_Iglv2	0.53548	13.8035	1.46274	0.226495	0.484357
ENSMUSG00000094319_Igkv4-54	0.34628	9.38795	1.45309	0.228033	0.484357
ENSMUSG00000096108_Ighv11-2	-0.720557	8.95932	1.45094	0.228376	0.484357
ENSMUSG00000076607_Igkj4	0.531184	14.803	1.42746	0.23218	0.484357
ENSMUSG00000093906_Igkv9-129	0.331344	10.0123	1.41939	0.233504	0.484357
ENSMUSG00000104575_Igkv9-119	1.0099	4.47058	1.41429	0.234345	0.484357
ENSMUSG00000076532_Igkv4-91	0.431272	8.69238	1.40768	0.235442	0.484357
ENSMUSG00000076526_Igkv12-98	0.471417	8.36154	1.39581	0.237426	0.484357
ENSMUSG00000076505_Igkv1-131	0.413437	8.77375	1.39338	0.237836	0.484357
ENSMUSG00000105928_Gm9256	0.711054	6.66474	1.38233	0.239705	0.484357
ENSMUSG00000104422_Ighv1-14	-0.926593	3.83924	1.38067	0.239987	0.484357
ENSMUSG00000076733_Ighv8-13	-0.907251	3.57763	1.37803	0.240436	0.484357
ENSMUSG00000076535_Igkv1-88	0.334989	9.52802	1.36258	0.243091	0.484942
ENSMUSG00000093894_Ighv1-53	-0.331864	10.3608	1.3561	0.244215	0.484942
ENSMUSG00000076583_Igkv8-24	-0.30269	9.87016	1.33343	0.248197	0.488821
ENSMUSG00000094322_Ighv9-4	0.350446	9.15945	1.32506	0.249685	0.488821
ENSMUSG00000096490_Igkv10-94	-0.364783	9.55513	1.27977	0.257942	0.49924
ENSMUSG00000106428_Gm42667	0.596238	6.88611	1.27214	0.259366	0.49924
ENSMUSG00000076533_Igkv4-90	-0.677187	6.17759	1.26657	0.260411	0.49924
ENSMUSG00000096020_Ighv1-75	-0.323557	10.7034	1.25715	0.262191	0.49924
ENSMUSG00000076514_Igkv17-121	0.308583	11.3131	1.24171	0.265142	0.501424
ENSMUSG00000094356_Igkv8-28	-0.310896	9.53488	1.21455	0.270432	0.507974
ENSMUSG00000076550_Igkv4-63	0.347531	8.90454	1.12612	0.288605	0.53514
ENSMUSG00000076522_Igkv16-104	0.27105	10.2715	1.12547	0.288744	0.53514
ENSMUSG00000106039_Iglc4	0.626748	6.10959	1.08547	0.297476	0.54428
ENSMUSG00000106372_Igkv14-126-1	0.640672	5.10651	1.08495	0.297592	0.54428
ENSMUSG00000076580_Igkv8-27	0.315113	10.7556	1.06094	0.303002	0.550552
ENSMUSG00000103290_Ighv1-23	-0.552987	6.51221	0.974579	0.323541	0.579332
ENSMUSG00000106494_Igkv2-107	-0.679546	4.49058	0.973541	0.323799	0.579332
ENSMUSG00000076652_Ighv7-3	-0.255795	10.0408	0.968348	0.325093	0.579332
ENSMUSG00000094088_Ighv1-64	-0.276952	10.8869	0.956442	0.328085	0.58094
ENSMUSG00000094124_Ighv1-74	-0.256972	10.1565	0.940798	0.332073	0.58263
ENSMUSG00000105231_Iglj3	0.445552	15.6412	0.929195	0.335072	0.58263
ENSMUSG00000079543_Igkv13-85	0.263507	9.54336	0.922318	0.336867	0.58263
ENSMUSG00000094194_Ighv5-16	0.260563	9.81106	0.9202	0.337423	0.58263
ENSMUSG00000094797_Igkv6-15	0.271672	10.5825	0.898712	0.343127	0.588823
ENSMUSG00000076562_Igkv4-50	-0.241572	10.1554	0.872993	0.350128	0.597151
ENSMUSG00000095079_Igha	0.622972	7.81467	0.849513	0.35669	0.603588
ENSMUSG00000096452_Ighv1-77	-0.290538	9.1802	0.844037	0.358245	0.603588
ENSMUSG00000095592_Ighd5-7	-0.649331	5.00802	0.819735	0.365258	0.610647
ENSMUSG00000095200_Ighv1-7	-0.260086	10.1568	0.806684	0.369102	0.610647
ENSMUSG00000076564_Igkv12-46	-0.244995	9.76199	0.802873	0.370236	0.610647
ENSMUSG00000076594_Igkv6-13	0.272288	9.2338	0.791167	0.373748	0.610647
ENSMUSG00000094505_Ighv8-6	0.472183	6.4845	0.783621	0.376036	0.610647
ENSMUSG00000096805_Ighv9-1	0.259737	10.0325	0.776118	0.378331	0.610647
ENSMUSG00000076523_Igkv15-103	0.241076	9.57426	0.774263	0.378901	0.610647
ENSMUSG00000076577_Igkv8-30	0.251965	9.67219	0.770679	0.380007	0.610647
ENSMUSG00000095007_Igkv12-41	-0.233281	9.65325	0.731549	0.392381	0.626908
ENSMUSG00000076538_Igkv13-84	0.308077	8.80405	0.697547	0.403609	0.634812
ENSMUSG00000076525_Igkv1-99	-0.481681	6.00351	0.697186	0.403731	0.634812
ENSMUSG00000105123_Ighv1-79	-0.491408	5.33511	0.693261	0.405057	0.634812
ENSMUSG00000094006_Igkv4-59	0.212161	10.3394	0.689125	0.406462	0.634812
ENSMUSG00000076709_Ighv1-47	-0.229033	9.68624	0.675184	0.41125	0.637072
ENSMUSG00000076608_Igkj5	0.377074	15.4868	0.671604	0.412493	0.637072
ENSMUSG00000102524_Ighv1-2	-0.254763	9.13169	0.643543	0.422431	0.648816
ENSMUSG00000118182_Gm50427	-0.442922	6.01716	0.616498	0.432352	0.659678
ENSMUSG00000096638_Ighv2-9	0.234766	9.19876	0.60414	0.437003	0.659678
ENSMUSG00000076615_Ighg3	-0.561091	4.29014	0.603954	0.437073	0.659678
ENSMUSG00000104975_Iglj2	0.7536	14.6635	0.593754	0.440971	0.659678
ENSMUSG00000095682_Igkv3-1	0.312557	8.17792	0.592726	0.441367	0.659678
ENSMUSG00000076518_Igkv2-112	0.263757	8.85308	0.579807	0.446388	0.663614
ENSMUSG00000094478_Igkv3-3	0.416938	5.93614	0.55996	0.454276	0.666536
ENSMUSG00000104679_Igkv4-60	0.315411	7.98018	0.557868	0.455121	0.666536
ENSMUSG00000105781_Igkv8-31	-0.558734	3.96972	0.554896	0.456324	0.666536
ENSMUSG00000076591_Igkv8-16	0.203195	10.7338	0.550915	0.457944	0.666536
ENSMUSG00000105547_Iglc3	0.339635	15.1082	0.543475	0.460996	0.667484
ENSMUSG00000094315_Igkv4-78	0.248892	8.89087	0.528743	0.467136	0.672869
ENSMUSG00000076617_Ighm	0.348183	17.3515	0.516631	0.472282	0.676776
ENSMUSG00000095565_Ighv2-9-1	0.184259	10.0522	0.489839	0.483999	0.686185
ENSMUSG00000106630_Igkv2-116	0.338122	7.19671	0.47925	0.488762	0.686185
ENSMUSG00000106256_Igkv12-47	0.405543	5.9583	0.475435	0.490497	0.686185
ENSMUSG00000104533_Igkv5-40-1	0.37538	6.26699	0.474944	0.490721	0.686185
ENSMUSG00000076540_Igkv4-80	-0.281334	8.40302	0.471912	0.492109	0.686185
ENSMUSG00000105606_Igkv2-109	0.245014	8.63257	0.468543	0.493658	0.686185
ENSMUSG00000096715_Igkv3-4	0.198275	9.23296	0.454165	0.500364	0.689542
ENSMUSG00000076710_Ighv1-49	-0.340366	7.30481	0.452746	0.501034	0.689542
ENSMUSG00000076547_Igkv4-70	0.246011	8.41093	0.418645	0.517614	0.707279
ENSMUSG00000096326_Ighv1-78	-0.317657	11.854	0.415859	0.519011	0.707279
ENSMUSG00000076609_Igkc	0.291222	16.7502	0.376625	0.539415	0.7315
ENSMUSG00000094102_Ighv9-2	-0.170329	9.43557	0.345284	0.556795	0.751403
ENSMUSG00000076512_Igkv9-123	0.271666	7.48863	0.334834	0.562826	0.753529
ENSMUSG00000076556_Igkv4-57	0.154729	10.5095	0.333181	0.563792	0.753529
ENSMUSG00000105432_Gm43218	0.148565	10.3498	0.303898	0.581449	0.769923
ENSMUSG00000096833_Igkv4-55	0.144094	10.0274	0.302141	0.582543	0.769923
ENSMUSG00000076549_Igkv4-68	-0.141049	10.5684	0.299229	0.584366	0.769923
ENSMUSG00000076555_Igkv4-57-1	-0.262437	7.71068	0.286703	0.592341	0.776749
ENSMUSG00000076552_Igkv4-61	-0.186117	8.66037	0.275535	0.599643	0.782632
ENSMUSG00000094509_Ighv14-1	-0.18997	8.69376	0.264318	0.607169	0.788752
ENSMUSG00000105605_Ighv1-86	-0.361815	4.23369	0.255571	0.61318	0.792856
ENSMUSG00000076688_Ighv15-2	-0.149383	9.4857	0.249244	0.617608	0.794885
ENSMUSG00000076563_Igkv5-48	-0.139571	9.4056	0.240044	0.624174	0.799633
ENSMUSG00000106239_Gm9260	0.287002	5.16385	0.21634	0.641843	0.814085
ENSMUSG00000102364_Ighv8-5	-0.161869	8.9979	0.215101	0.642798	0.814085
ENSMUSG00000076655_Ighv4-1	-0.121571	10.5384	0.208918	0.647617	0.814085
ENSMUSG00000105363_Igkv11-114	0.240279	6.348	0.201842	0.653238	0.814085
ENSMUSG00000098814_Igkv19-93	0.124635	11.7787	0.196595	0.657484	0.814085
ENSMUSG00000096670_Ighv2-6	0.155854	8.76413	0.196292	0.657731	0.814085
ENSMUSG00000076677_Ighv6-3	-0.120845	11.0785	0.191935	0.661311	0.814085
ENSMUSG00000076618_Ighj4	-0.186959	14.1885	0.190109	0.662826	0.814085
ENSMUSG00000094335_Igkv1-117	0.114968	10.805	0.189324	0.66348	0.814085
ENSMUSG00000094491_Igkv1-133	0.139407	9.00615	0.184743	0.667329	0.814085
ENSMUSG00000093876_Ighd5-3	0.276262	6.71784	0.182108	0.669568	0.814085
ENSMUSG00000076665_Ighv7-1	-0.120349	9.50395	0.180906	0.670595	0.814085
ENSMUSG00000106387_Igkv4-73	-0.13778	9.07079	0.177084	0.673891	0.814529
ENSMUSG00000076605_Igkj2	0.176885	15.0226	0.156837	0.692086	0.826394
ENSMUSG00000076530_Igkv11-106	-0.187364	7.45791	0.15563	0.693212	0.826394
ENSMUSG00000096632_Igkv9-124	-0.108583	10.6292	0.154685	0.694098	0.826394
ENSMUSG00000095497_Igkv1-122	-0.126947	9.05959	0.14999	0.698545	0.826394
ENSMUSG00000076587_Igkv6-20	-0.162909	8.54753	0.149963	0.698571	0.826394
ENSMUSG00000096580_Igkv1-132	0.186139	7.36224	0.139401	0.708877	0.833794
ENSMUSG00000095753_Igkv4-53	-0.0957775	10.275	0.137455	0.710824	0.833794
ENSMUSG00000076541_Igkv4-79	0.121632	8.93988	0.120513	0.728479	0.850912
ENSMUSG00000106405_Iglj3p	0.191227	7.86506	0.114871	0.734665	0.854548
ENSMUSG00000076573_Igkv1-35	0.209846	4.7678	0.111133	0.738858	0.855844
ENSMUSG00000076576_Igkv6-32	-0.0805505	10.1079	0.100261	0.751517	0.864997
ENSMUSG00000105499_Igkv3-11	0.18048	5.86457	0.0989656	0.753074	0.864997
ENSMUSG00000076604_Igkj1	0.137929	15.0231	0.0964808	0.756094	0.864997
ENSMUSG00000102381_Ighv8-7	0.184657	5.86355	0.0849991	0.770634	0.878017
ENSMUSG00000076548_Igkv4-69	-0.0933996	9.0418	0.0811607	0.775731	0.880217
ENSMUSG00000096577_Ighv1-71	0.0923462	8.99557	0.0775382	0.780662	0.880375
ENSMUSG00000095633_Igkv4-58	-0.0941532	9.709	0.076424	0.782203	0.880375
ENSMUSG00000076674_Ighv3-8	0.0733616	10.1638	0.0707659	0.790225	0.885817
ENSMUSG00000095351_Igkv3-2	-0.0653606	10.22	0.0673452	0.795242	0.886693
ENSMUSG00000096767_Ighv1-62-3	-0.087	8.90786	0.0659112	0.797386	0.886693
ENSMUSG00000076619_Ighj3	-0.101747	14.1264	0.0560673	0.812823	0.892826
ENSMUSG00000076571_Igkv5-37	-0.144791	5.66304	0.0550807	0.814447	0.892826
ENSMUSG00000095642_Ighv14-3	-0.0592904	10.1188	0.0548257	0.814869	0.892826
ENSMUSG00000104742_Igkv9-128	-0.192141	4.40319	0.0542972	0.815748	0.892826
ENSMUSG00000076572_Igkv18-36	0.109423	6.83413	0.0466412	0.829014	0.900735
ENSMUSG00000091087_Ighv8-14	-0.185163	2.99762	0.046398	0.829454	0.900735
ENSMUSG00000094872_Igkv9-120	0.0558444	11.1236	0.0435347	0.834722	0.902928
ENSMUSG00000076614_Ighg1	-0.138191	3.97845	0.0399382	0.841601	0.904972
ENSMUSG00000076536_Igkv4-86	-0.0537582	9.8656	0.0391652	0.843122	0.904972
ENSMUSG00000096422_Igkv12-44	0.0489127	10.0671	0.0365998	0.848282	0.907009
ENSMUSG00000094902_Igkv10-95	-0.0491155	10.0556	0.034662	0.852306	0.90782
ENSMUSG00000093861_Igkv1-110	0.0437599	10.0831	0.0284162	0.866134	0.919028
ENSMUSG00000106667_Igkv3-6	-0.105054	4.1313	0.0230625	0.879295	0.927608
ENSMUSG00000076508_Igkv17-127	0.039725	11.4243	0.0213199	0.883911	0.927608
ENSMUSG00000076586_Igkv8-21	0.040343	9.7148	0.0191341	0.889983	0.927608
ENSMUSG00000102901_Ighv5-1	0.0716244	6.66648	0.0179909	0.8933	0.927608
ENSMUSG00000102535_Ighv1-41	-0.0722863	6.75061	0.0176822	0.894213	0.927608
ENSMUSG00000076939_Iglv3	0.0555802	13.3533	0.0176729	0.894241	0.927608
ENSMUSG00000103939_Ighv3-4	0.0775539	6.27476	0.0149984	0.902528	0.932725
ENSMUSG00000096459_Ighv9-3	-0.0293108	12.2721	0.00813855	0.928117	0.955617
ENSMUSG00000095210_Ighv5-9-1	0.0220843	9.94401	0.00651178	0.935684	0.959853
ENSMUSG00000076569_Igkv5-39	-0.0135862	11.159	0.00255699	0.959671	0.98084
ENSMUSG00000076545_Igkv4-72	-0.0119001	9.09633	0.00147271	0.969388	0.984013
ENSMUSG00000106016_Igkv4-56	0.0175663	7.48033	0.00142818	0.969854	0.984013
ENSMUSG00000095583_Ighv14-2	0.00620192	10.4776	0.000525775	0.981706	0.989759
ENSMUSG00000076539_Igkv4-81	0.0110108	7.27231	0.000473553	0.982638	0.989759
ENSMUSG00000094930_Igkv6-25	0.00332581	9.72611	0.000153572	0.990113	0.99367
ENSMUSG00000076646_Ighv2-6-8	-0.00363869	7.72935	6.29436e-05	0.99367	0.99367
